# Supplementary material for: Use of Cumulative Poisson Probability Distribution as an Estimator of the Recombination Rate in an Expanding Population: Example of the Macaca fascicularis Major Histocompatibility Complex
Source: PubMed Central journal article supplement (PMC3276188; doi:10.1534/g3.111.001248), 2012-01-01
Supplement: supp_2.1.123_TableS1.pdf [file supp_2.1.123_TableS1.pdf]

**Table S1 Primers used to amplify the 18 MHC microsatellites**

| Microsatellite | Forward                     | Reverse                     | Ref <sup>(a)</sup> |
|----------------|-----------------------------|-----------------------------|--------------------|
| <b>D6S2972</b> | AAATGTGAGAATAAAGGAGA        | GATAAAGGGGAAGCTACTACA       | 1                  |
| <b>D6S2970</b> | TCCATGGTCAAGTTCTCAG         | TCATGGATCTTATCAGCCTC        | 1                  |
| <b>D6S2854</b> | TCATGAGCGTGGCACTGCAC        | CCGTATGTTGCAACCAGGAG        | 1                  |
| <b>D6S2704</b> | TTTTGCCACTCTGGAGGATGGG      | GAGCATAATATCTGGTCTACTGC     | 1                  |
| <b>D6S2847</b> | TATTGGACAGCACTGCTCTGG       | TGCCATTAGATTGGTTTTCTG       | 1                  |
| <b>C4-2-25</b> | ATGTTAGTTTTAGAAGATAACACTC   | TCTTCTGTGCAAGCAAGCACTGTAC   | 1                  |
| <b>D6S2691</b> | GTAGCTGTGGAAACAGTGCCATG     | CTTGACTTGAAACTCAGAGACC      | 1                  |
| <b>MICA</b>    | CCTTTTTTTCAGGGAAAGTGC       | CCTTACCATCTCCAGAAACTGC      | 1                  |
| <b>D6S2793</b> | CTACCTCCTTGCCAACTTGCTATTTGT | AATAGCCATGAGAAGCTATGTGGGGGA | 1                  |
| <b>D6S2782</b> | TTTACTTGCTCTCACTCTCAGGCC    | GGAAGACATTAAGTTGTTAGCA      | 1                  |
| <b>D6S2669</b> | TGCCTCCGTAAGCCTCAGTCT       | TTAAGGACAGCAAAGCCAGCAGCA    | 1                  |
| <b>D6S2892</b> | TGCATGTCCTGTGAGGTAAG        | ACTCAACCCTGCTGTTGTAG        | 1                  |
| <b>DRACA</b>   | TGGAATCTCATCAAGGTCAG        | ACATTTGTATGCTTCAGATG        | 2                  |
| <b>D6S2876</b> | GGTAAAATTCCTGACTGGCC        | GACAGCTCTTCTAACCTGC         | 1                  |
| <b>D6S2747</b> | AGGAATCTAGTCTCTCTCC         | CTCTAGCAAAGGAAGAGCC         | 1                  |
| <b>D6S2745</b> | CCTAGAGATTCTCCACATTA        | CCAATGTTTGATAGCAGACTGGGGT   | 1                  |
| <b>D6S2771</b> | ATTCTTTCACTAGTTCTGG         | CCACTTTAAGAAATTAGAAAAG      | 1                  |
| <b>D6S2741</b> | AGACTAGATGTAGGGCTAGC        | CTGCACTTGGCTATCTCAAC        | 1                  |

<sup>(a)</sup> Reference quoted in the table: (1) WISEMAN *et al.* 2007, (2) BONHOMME *et al.* 2005
